# Supplementary material
Source: publisher figshare collection journal article supplement (https://tandf.figshare.com/ndownloader/files/36574058)
Supplement: Supplementary file 1 [file 36574058]

**Supplementary Table 3** CSF titration frequency table

| titers | Frequency | % | Cumulative % |
| --- | --- | --- | --- |
| <1:8 | 16 | 8.2 | 8.2 |
| 1:8 | 2 | 1.0 | 9.2 |
| 1:10 | 10 | 5.1 | 14.4 |
| 1:20 | 16 | 8.2 | 22.6 |
| 1:40 | 23 | 11.8 | 34.4 |
| 1:80 | 38 | 19.5 | 53.8 |
| 1:160 | 36 | 18.5 | 72.3 |
| 1:320 | 25 | 12.8 | 85.1 |
| 1:640 | 14 | 7.2 | 92.3 |
| 1:1280 | 10 | 5.1 | 97.4 |
| >1:1280 | 5 | 2.6 | 100.0 |
| Total | 195 | 100 |  |
